# Supplementary material for: Composite photocatalysts based on Cd1−xZnxS and TiO2 for hydrogen production under visible light: effect of platinum co-catalyst location
Source: Royal Society of Chemistry journal article supplement (doi:10.1039/d1ra06845h), 2021-01-01
Supplement: d1ra06845h1.pdf [file d1ra06845h1.pdf]

## Supporting Information

### **Composite photocatalysts based on $\text{Cd}_{1-x}\text{Zn}_x\text{S}$ and $\text{TiO}_2$ for hydrogen production under visible light: effect of platinum co-catalyst location**

*Angelina V. Zhurenok, Dina V. Markovskaya, Evgeny Yu. Gerasimov, Svetlana V. Cherepanova, Andrey V. Bukhtiyarov, Ekaterina A. Kozlova\**

<sup>1</sup>Federal Research Center Boreskov Institute of Catalysis, 630090, Pr. Ak. Lavrentieva, 5,  
Novosibirsk, Russia

\* Corresponding author. Tel./fax: +7-383-326-95-43; e-mail address: [kozlova@catalysis.ru](mailto:kozlova@catalysis.ru)  
630090, Pr. Ak. Lavrentieva, 5, Novosibirsk, Russia

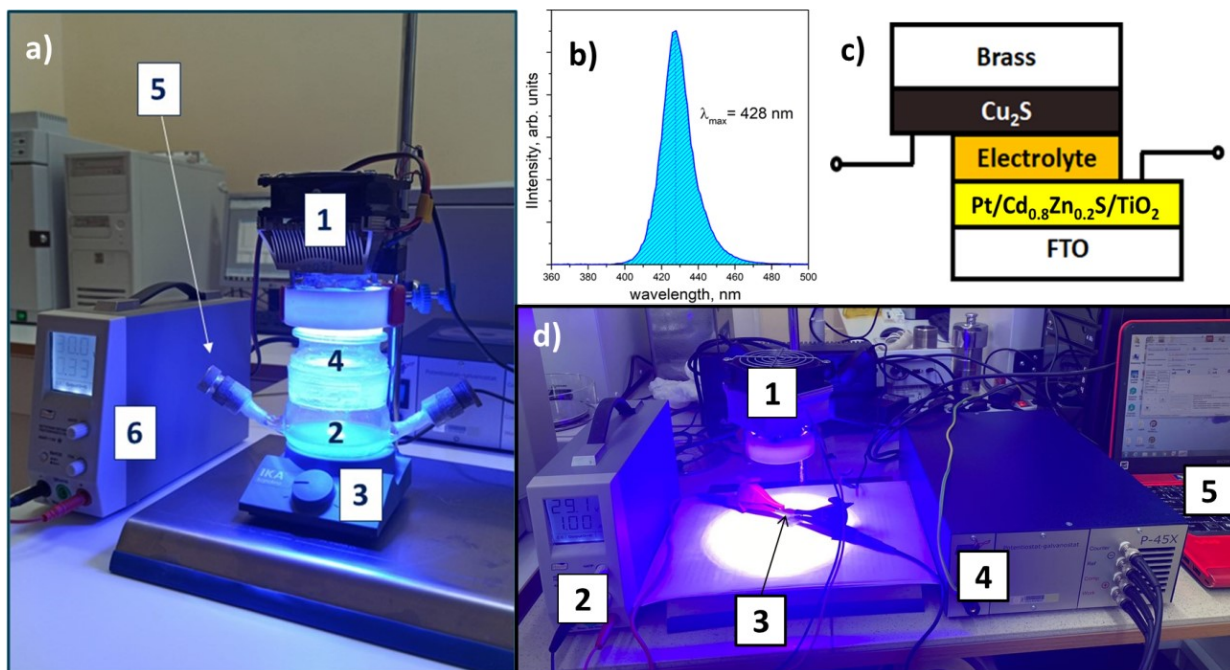

**Figure S1. a) The experimental set-up for the photocatalytic hydrogen production; b) Emission spectrum of 425-LED; c) Scheme of the photoelectrochemical cell; d) Set-up for the studying photoelectrochemical properties.**

**Figure 1a:** The photodiode (1) illuminated the reactor (2) through a quartz window (4). The reaction mixture was stirred with magnetic stirrer (3). The reactor had a sampling port (5) using for analysis of hydrogen amount. The hydrogen concentration was measured by a gas chromatograph “Khromos GKh-1000” (Khromos, Russia). The diode (1) was connected to the power supply (6).

**Figure 1d:** The photodiode (1) connected to the power supply (2) illuminated the photoelectrochemical cell (3). Photoelectrochemical characteristics were obtained with using a potentiostat-galvanostat P-45X (Russia) (4). The obtained experimental data were analyzed by ES8 software (5).

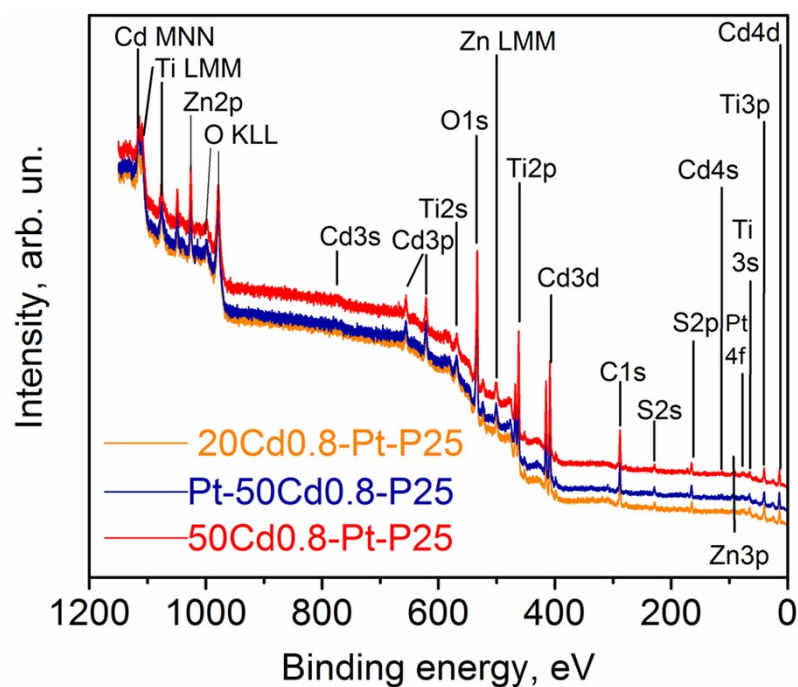

**Figure S2.** Survey XPS spectra of 50Cd0.8-Pt-P25, Pt-50Cd0.8-P25, and Pt-20Cd0.8-P25.

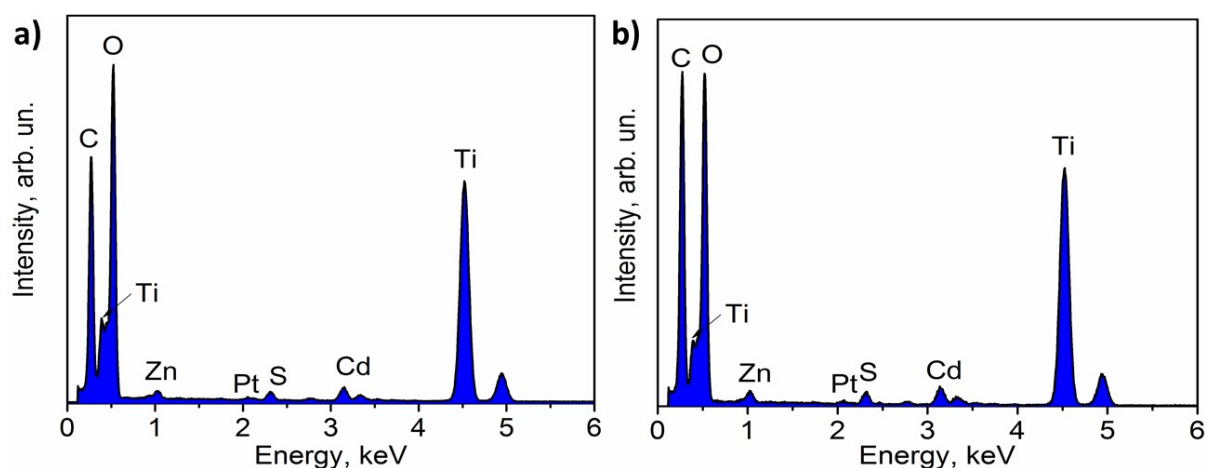

| Sample                | Weight content of corresponding element, % |      |       |      |      |      |
|-----------------------|--------------------------------------------|------|-------|------|------|------|
|                       | O                                          | S    | Ti    | Zn   | Cd   | Pt   |
| <b>Pt-20Cd0.8-P25</b> | 37.94                                      | 1.14 | 54.03 | 1.00 | 5.28 | 0.61 |
| <b>20Cd0.8-Pt-P25</b> | 35.16                                      | 1.58 | 54.34 | 1.60 | 7.03 | 0.28 |

**Figure S3.** EDX spectra of a) location of photocatalyst Pt-20Cd0.8-P25 depicted in Fig. 4d; a) location of photocatalyst 20Cd0.8-Pt-P25 depicted in Fig. 5d. Table shows the numerical data.

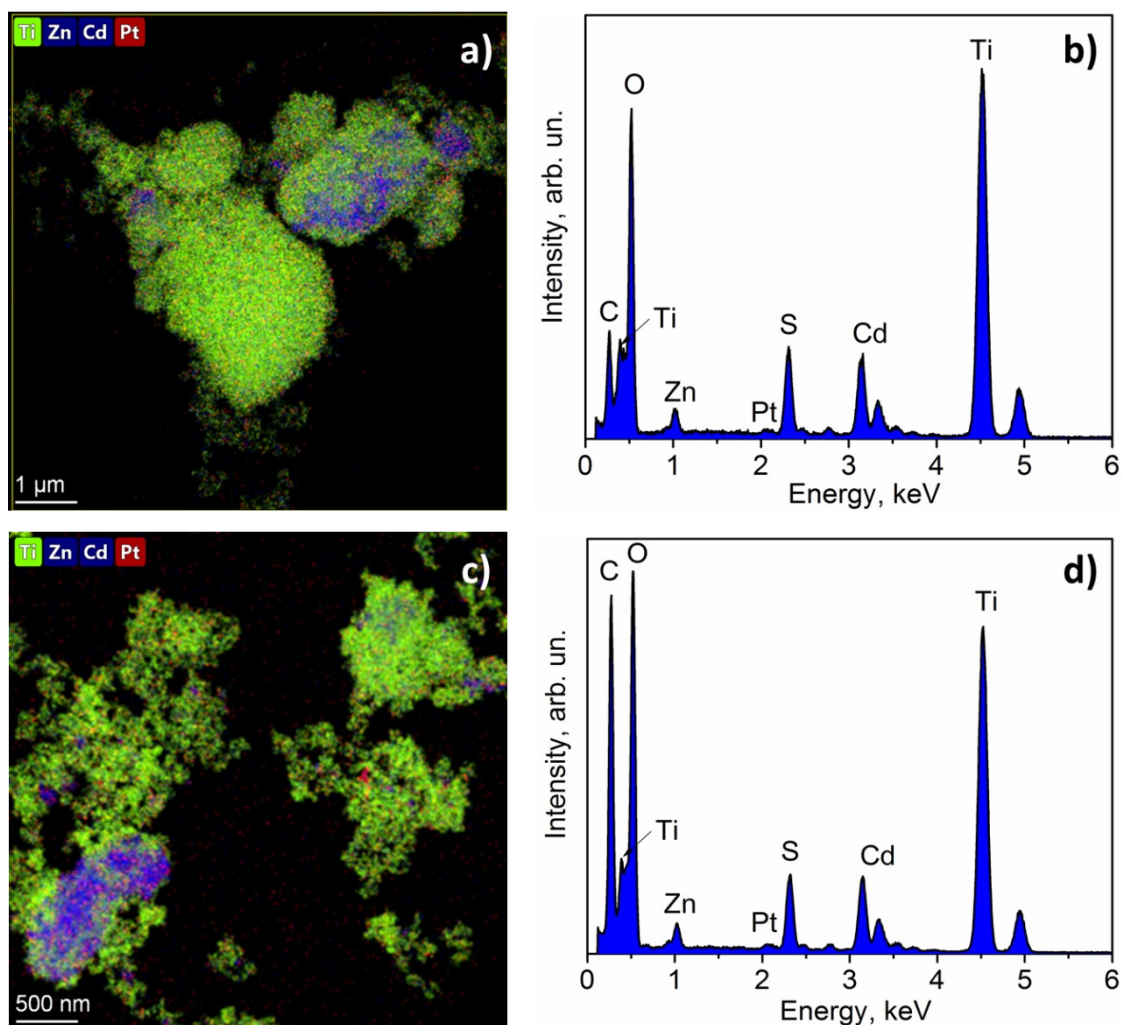

| Sample                | Weight content of corresponding element, % |      |       |      |       |      |
|-----------------------|--------------------------------------------|------|-------|------|-------|------|
|                       | O                                          | S    | Ti    | Zn   | Cd    | Pt   |
| <b>Pt-20Cd0.8-P25</b> | 19.92                                      | 7.32 | 50.08 | 3.35 | 18.77 | 0.57 |
| <b>20Cd0.8-Pt-P25</b> | 25.24                                      | 6.94 | 45.46 | 3.07 | 18.41 | 0.88 |

**Figure S4. Elemental mapping (a) and EDX spectrum (b) of photocatalyst 20Cd0.8-Pt-P25; Elemental mapping (c) and EDS spectrum (d) of photocatalyst Pt-20Cd0.8-P25. Table shows the numerical data.**
